# Supplementary material for: Archaea/eukaryote-specific ribosomal proteins - guardians of a complex structure
Source: PubMed Central journal article supplement — Comput Struct Biotechnol J. 2023 Jan 27;21:1249–61. doi: 10.1016/j.csbj.2023.01.037 (PMC9932298; doi:10.1016/j.csbj.2023.01.037), 2023-01-27
Supplement: mmc1.pdf [file mmc1.pdf]

# **Archaea/eukaryote-specific ribosomal proteins - guardians of a complex structure**

Ivan Kisly and Tiina Tamm

## **SUPPLEMENTARY MATERIAL**

Supplementary Tables S1-S2  
Supplementary Figures S1-S3  
Supplementary References

**Supplementary Table S1. Characteristics of archaea/eukaryote-specific r-proteins.**

| Protein <sup>3</sup> | <i>Euryarchaeota</i>            |       | Lower eukaryotes                  |       | Higher eukaryotes              |       |
|----------------------|---------------------------------|-------|-----------------------------------|-------|--------------------------------|-------|
|                      | <i>P. furiosus</i> <sup>1</sup> |       | <i>S. cerevisiae</i> <sup>2</sup> |       | <i>H. sapiens</i> <sup>1</sup> |       |
|                      | Length (aa)                     | pI    | Length (aa)                       | pI    | Length (aa)                    | pI    |
| eS1                  | 198                             | 9.97  | 255                               | 10.75 | 264                            | 9.75  |
| eS4                  | 243                             | 9.89  | 261                               | 10.73 | 263                            | 10.16 |
| eS6                  | 125                             | 9.88  | 236                               | 11.14 | 249                            | 10.85 |
| eS8                  | 127                             | 11.52 | 200                               | 11.33 | 208                            | 10.32 |
| eS17                 | 67                              | 10.49 | 136                               | 11.15 | 135                            | 9.85  |
| eS19                 | 150                             | 9.72  | 144                               | 10.12 | 145                            | 10.31 |
| eS24                 | 99                              | 7.84  | 135                               | 11.20 | 133                            | 10.79 |
| eS25                 | -                               | -     | 108                               | 11.02 | 125                            | 10.12 |
| eS27                 | 63                              | 9.38  | 82                                | 9.51  | 84                             | 9.57  |
| eS28                 | 71                              | 9.95  | 67                                | 11.42 | 69                             | 10.70 |
| eS30                 | -                               | -     | 63                                | 12.22 | 57                             | 12.15 |
| eS31                 | 50                              | 9.55  | 76                                | 10.13 | 80                             | 9.86  |
|                      |                                 |       |                                   |       |                                |       |
| eL8                  | 123                             | 5.35  | 256                               | 10.72 | 266                            | 10.61 |
| eL13                 | -                               | -     | 199                               | 11.76 | 211                            | 11.65 |
| eL14                 | 83                              | 10.35 | 138                               | 11.62 | 215                            | 10.94 |
| eL15                 | 194                             | 11.02 | 204                               | 11.91 | 204                            | 11.62 |
| eL18                 | 120                             | 10.35 | 186                               | 12.23 | 188                            | 11.73 |
| eL19                 | 150                             | 10.93 | 189                               | 11.91 | 196                            | 11.48 |
| eL20                 | 77                              | 9.73  | 172                               | 10.92 | 176                            | 10.72 |
| eL21                 | 97                              | 11.42 | 160                               | 11.00 | 160                            | 10.49 |
| eL24                 | 66                              | 9.97  | 155                               | 11.90 | 157                            | 11.26 |
| eL30                 | 99                              | 7.89  | 105                               | 10.35 | 115                            | 9.65  |
| eL31                 | 95                              | 10.10 | 113                               | 10.66 | 125                            | 10.54 |
| eL32                 | 130                             | 11.19 | 130                               | 11.79 | 135                            | 11.32 |
| eL33                 | 87                              | 10.62 | 107                               | 11.63 | 110                            | 11.07 |
| eL34                 | 89                              | 11.69 | 121                               | 11.51 | 117                            | 11.48 |
| eL37                 | 62                              | 11.50 | 88                                | 12.17 | 97                             | 11.74 |
| eL38                 | -                               | -     | 78                                | 11.63 | 70                             | 10.10 |
| eL39                 | 51                              | 12.38 | 51                                | 13.06 | 51                             | 12.55 |
| eL40                 | 51                              | 10.56 | 52                                | 10.32 | 52                             | 10.32 |
| eL41                 | 37                              | 12.66 | 25                                | 13.46 | 25                             | 12.96 |
| eL42                 | 94                              | 10.89 | 106                               | 11.32 | 106                            | 10.59 |
| eL43                 | 83                              | 11.27 | 92                                | 11.05 | 92                             | 10.44 |
| P1                   | 107                             | 4.29  | 106                               | 3.53  | 114                            | 4.21  |
| P2                   | -                               | -     | 106                               | 3.68  | 115                            | 4.38  |

<sup>1</sup> Data source: UniProt [1]

<sup>2</sup> Data source: Saccharomyces Genome Database [2]. Where the r-protein is encoded by paralogous genes, the data are given for the r-protein encoded by paralog A.

<sup>3</sup> Protein names are according to the nomenclature from [3]

**Supplementary Table S2. Positional homology of bacteria-specific and archaea/eukaryote-specific r-proteins.** To analyse positional homology, PDB coordinates 6BU8 for *E. coli* [4], 4V6U for *P. furiosus* [5], and 4V88 for *S. cerevisiae* [6] were rendered in PyMol. R-proteins that interact with rRNA are included. Conserved interactions are indicated in bold.

| Bacteria             |                                                               | <i>Euryarchaeota</i> |                                                                                         | Lower eukaryotes     |                                                                                                                         |
|----------------------|---------------------------------------------------------------|----------------------|-----------------------------------------------------------------------------------------|----------------------|-------------------------------------------------------------------------------------------------------------------------|
| <i>E. coli</i>       |                                                               | <i>P. furiosus</i>   |                                                                                         | <i>S. cerevisiae</i> |                                                                                                                         |
| Protein <sup>1</sup> | rRNA                                                          | Protein <sup>1</sup> | rRNA                                                                                    | Protein <sup>1</sup> | rRNA                                                                                                                    |
| bS6                  | <b>h22, h23</b>                                               | eS1                  | <b>h22, h23</b> , h26                                                                   | eS1                  | <b>h22, h23</b> , h23a, h26, ES7, h45                                                                                   |
| bS16                 | h4, h6a, <b>h7, h15</b> , h17, <b>h21</b>                     | eS4                  | <b>h7</b> , h9, h12, <b>h15</b> , <b>h21</b>                                            | eS4                  | <b>h7</b> , h9, h12, h13, <b>h15</b> , <b>h21</b>                                                                       |
| bS18                 | <b>h23, h26</b>                                               | eS1                  | h22, <b>h23, h26</b>                                                                    | eS1                  | h22, <b>h23</b> , h23a, <b>h26</b> , ES7, h45                                                                           |
| bS20                 | h6, h8, <b>h9, h11</b> , <b>h13</b> , h14, <b>h44</b>         | eS8                  | h6a, h7, <b>h9, h11</b> , <b>h13, h44</b>                                               | eS8                  | h6a, h7, <b>h9</b> , ES3a, ES3b, <b>h11, h13, h44</b>                                                                   |
| bL17                 | <b>H47</b> , H57, <b>H61</b> , <b>H96</b> , H100, <b>H101</b> | eL31                 | <b>H47</b> , H48, <b>H61</b> , <b>H96</b> , H100, <b>H101</b>                           | eL31                 | <b>H47</b> , H48, <b>H61</b> , <b>H96</b> , <b>H101</b>                                                                 |
| bL19                 | H64, <b>H96</b> , H101                                        | eL24                 | H64, <b>H96</b> , H101                                                                  | eL24                 | H63a, <b>H96</b> , ES41                                                                                                 |
| bL20                 | H2, H4, <b>H25</b> , H25a, <b>H41</b> , H46                   | eL33                 | <b>H25</b> , H40, <b>H41</b>                                                            | eL33                 | <b>H25</b> , ES7b, H40, <b>H41</b> , ES39                                                                               |
| bL27                 | H38, <b>H81</b> , H82, <b>H86</b> ;<br><b>5S rRNA H1</b>      | eL21                 | H38, H80, <b>H81</b> , H85, <b>H86</b> , H87;<br><b>5S rRNA H1</b>                      | eL21                 | H38a, ES12, H80, <b>H81</b> , H83, <b>H86</b> , H87; <b>5S rRNA H1</b>                                                  |
| bL28                 | <b>H11, H21, H52</b> , <b>H75, H79</b>                        | eL15                 | H10, <b>H11</b> , H14, H15, <b>H21</b> , H32, <b>H52</b> , H66, <b>H75</b> , <b>H79</b> | eL15                 | ES4, <b>H11</b> , H13, H14, H15, <b>H21</b> , H22, H28, ES8, H35a, <b>H52</b> , H66, <b>H75, H79</b> ;<br>5.8S rRNA H10 |
| bL33                 | <b>H83, H86, H88</b>                                          | eL42                 | H11, H21, H68, H75, H82, <b>H83</b> , <b>H86, H88</b>                                   | eL42                 | H11, H21, ES9, H74, H82, <b>H83, H86, H88</b>                                                                           |
| bL34                 | <b>H11, H23, H33</b> , <b>H35</b> , H52                       | eL37                 | H4, H5, H6, H8, <b>H11, H23, H33</b> , <b>H35</b> , H35a, H49a, H52, H65                | eL37                 | <b>H11, H23</b> , H32, <b>H33</b> , <b>H35</b> , H35a, H65;<br>5.8S rRNA: H4, H5, H6, H7                                |
| bL36                 | <b>H42, H89, H91</b> , <b>H97</b>                             | eL40                 | <b>H42</b> , H44, <b>H89</b> , <b>H91, H97</b>                                          | eL40                 | <b>H42, H89, H91, H97</b>                                                                                               |

<sup>1</sup> Protein names are according to the nomenclature from [3]

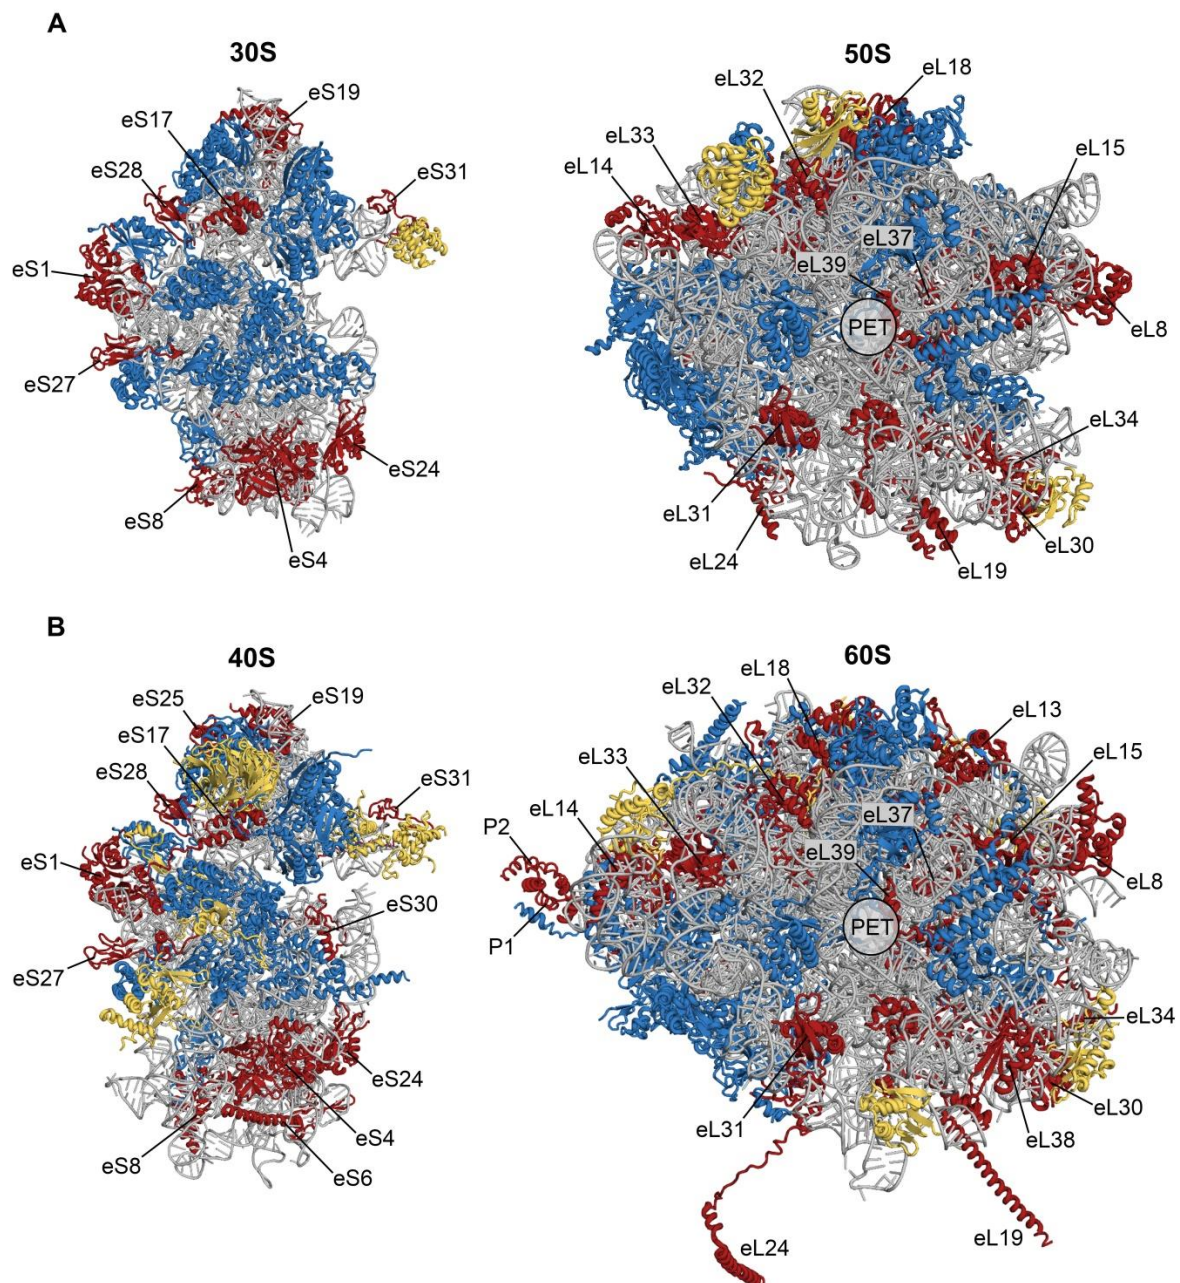

**Supplementary Figure S1. Comparison of the location of archaea/eukaryote-specific r-proteins in archaeal and eukaryotic ribosomes.**

Solvent view of individual subunits of *Pyrococcus furiosus* (A) and *Saccharomyces cerevisiae* (B) (left – SSU (30S, 40S), right – LSU (50S, 60S)) are shown. rRNA and universally conserved r-proteins are highlighted in grey and dark blue, respectively. Archaea/eukaryote-specific proteins are colored red and labelled. Domain-specific proteins are yellow. Approximate position of the peptide exit tunnel (PET) is indicated.

Protein groups and nomenclature are according to [3]. PDB coordinates 4V6U for *P. furiosus* [5] and 4V88 for *S. cerevisiae* [6] were rendered in PyMol.

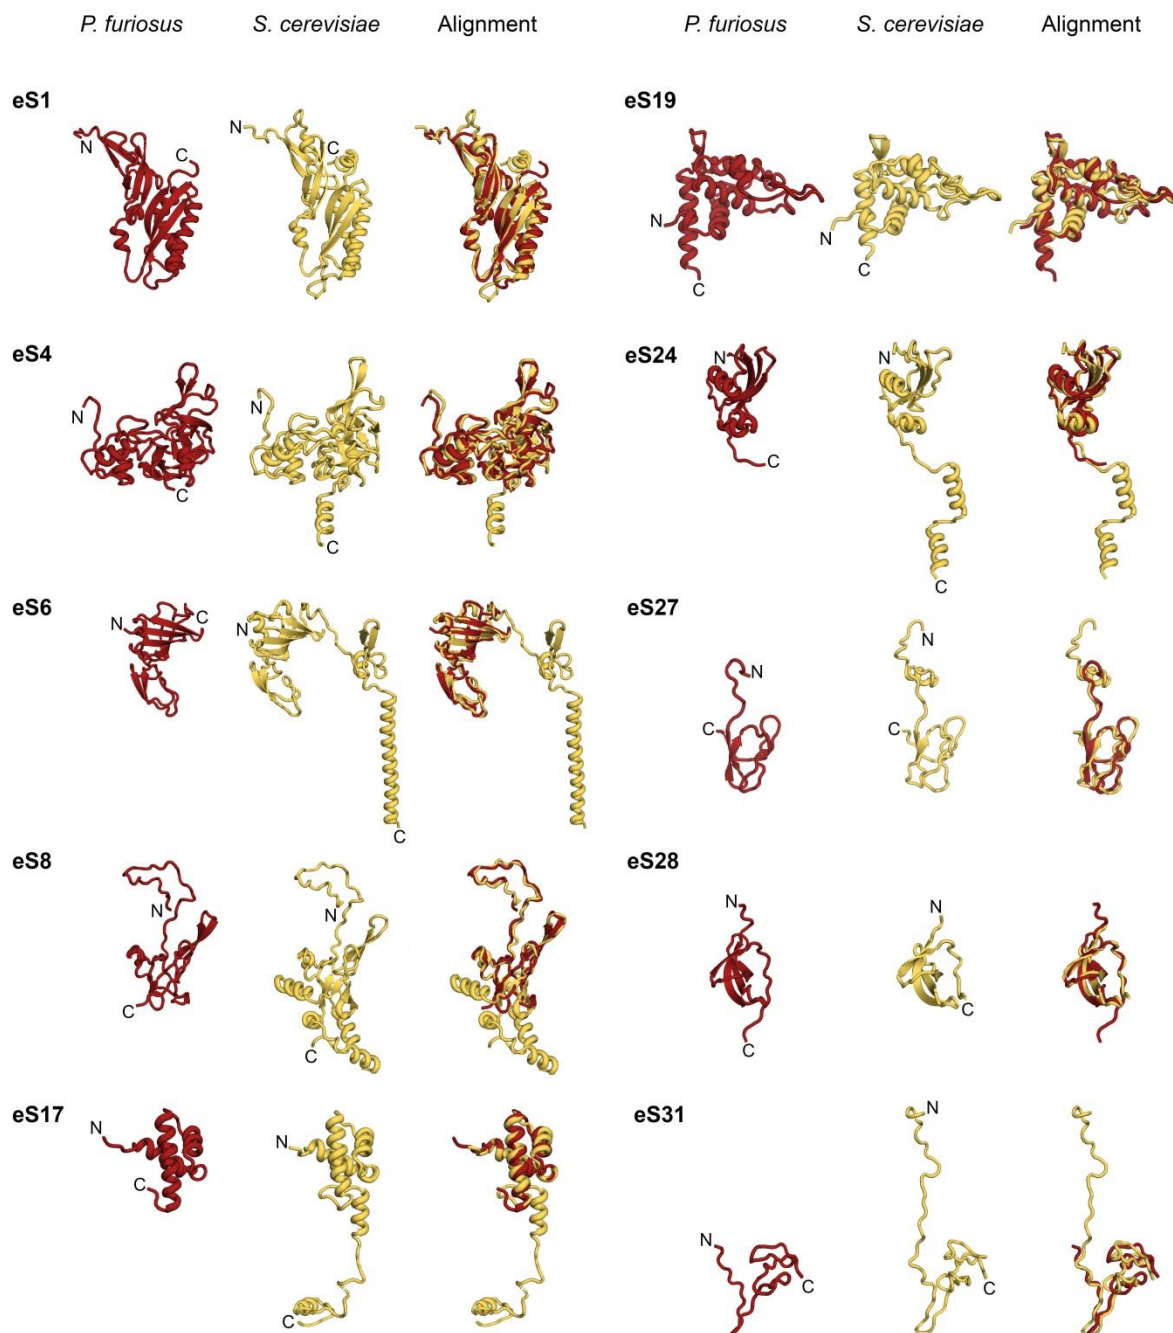

**Supplementary Figure S2. Comparison of the architecture of archaea/eukaryote-specific r-proteins of small ribosomal subunit.**

R-proteins from archaeal ribosome (*P. furiosus*) are colored red. R-proteins from eukaryotic ribosome (*S. cerevisiae*) are shown in yellow. The positions of the N and C termini are indicated. Structural alignments reveal the structurally conserved core and domain specific extensions.

PDB coordinates 4V6U for *P. furiosus* [5] and 4V88 for *S. cerevisiae* [6] were rendered in PyMol.



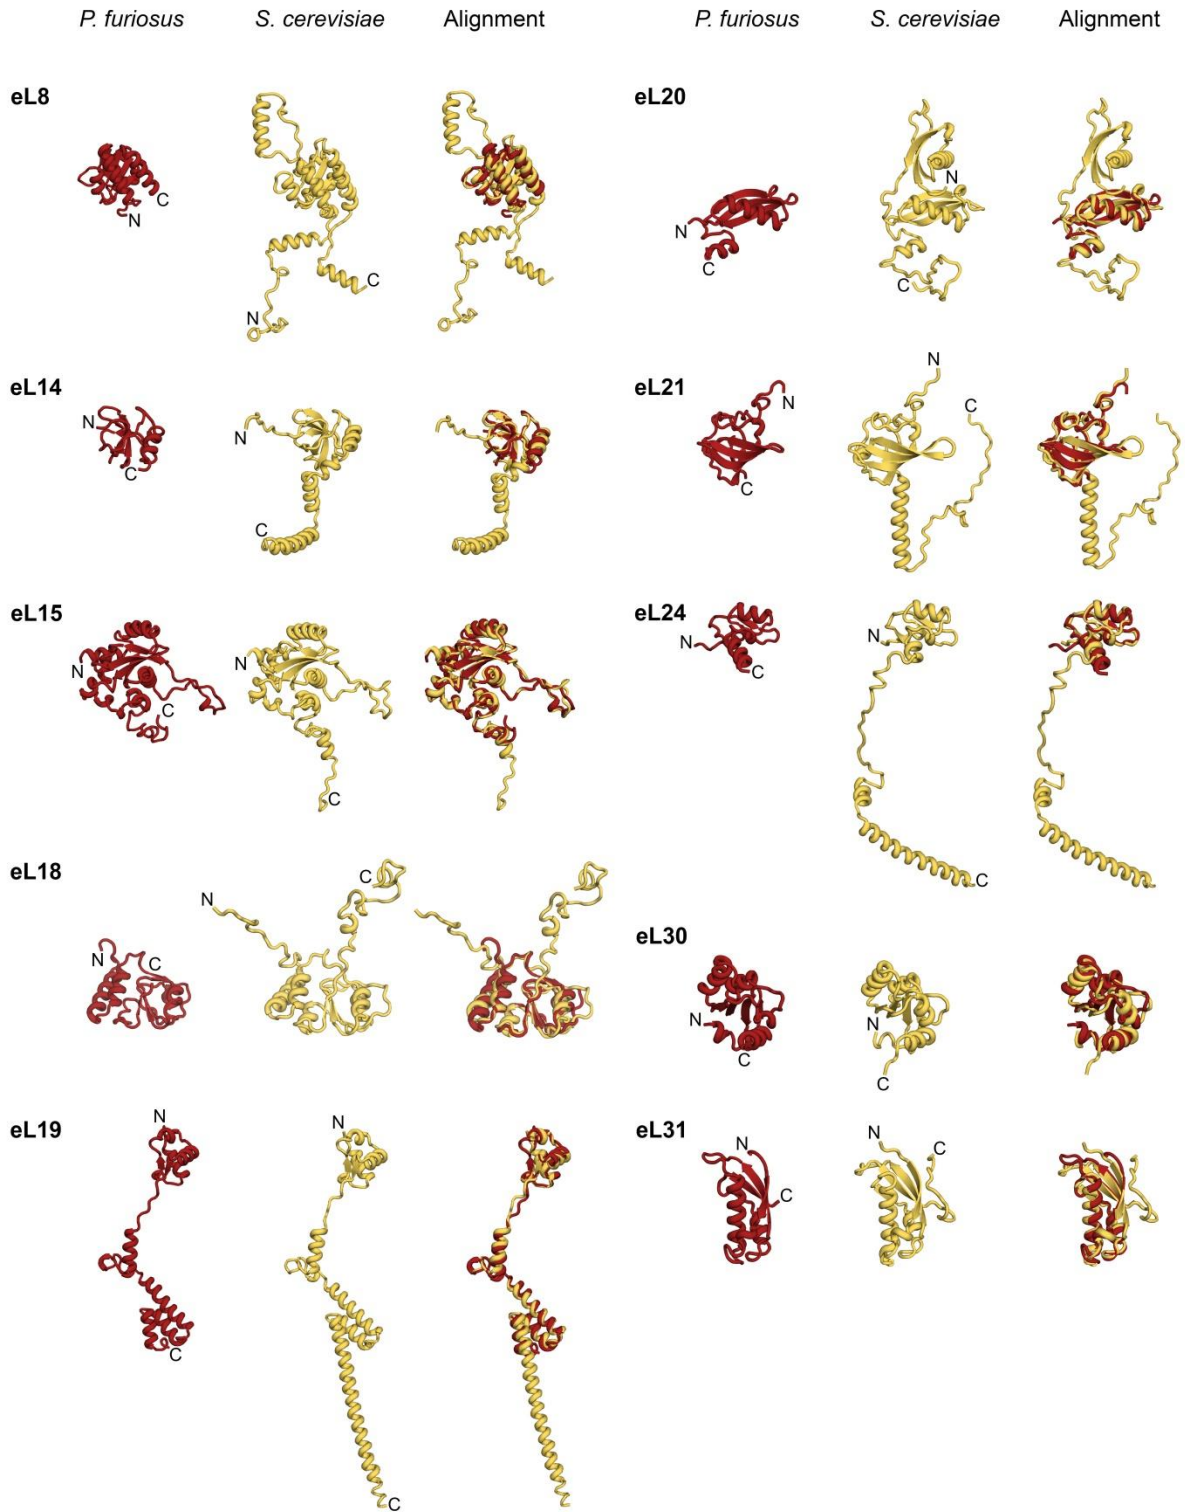

Supplementary Figure S3 continues

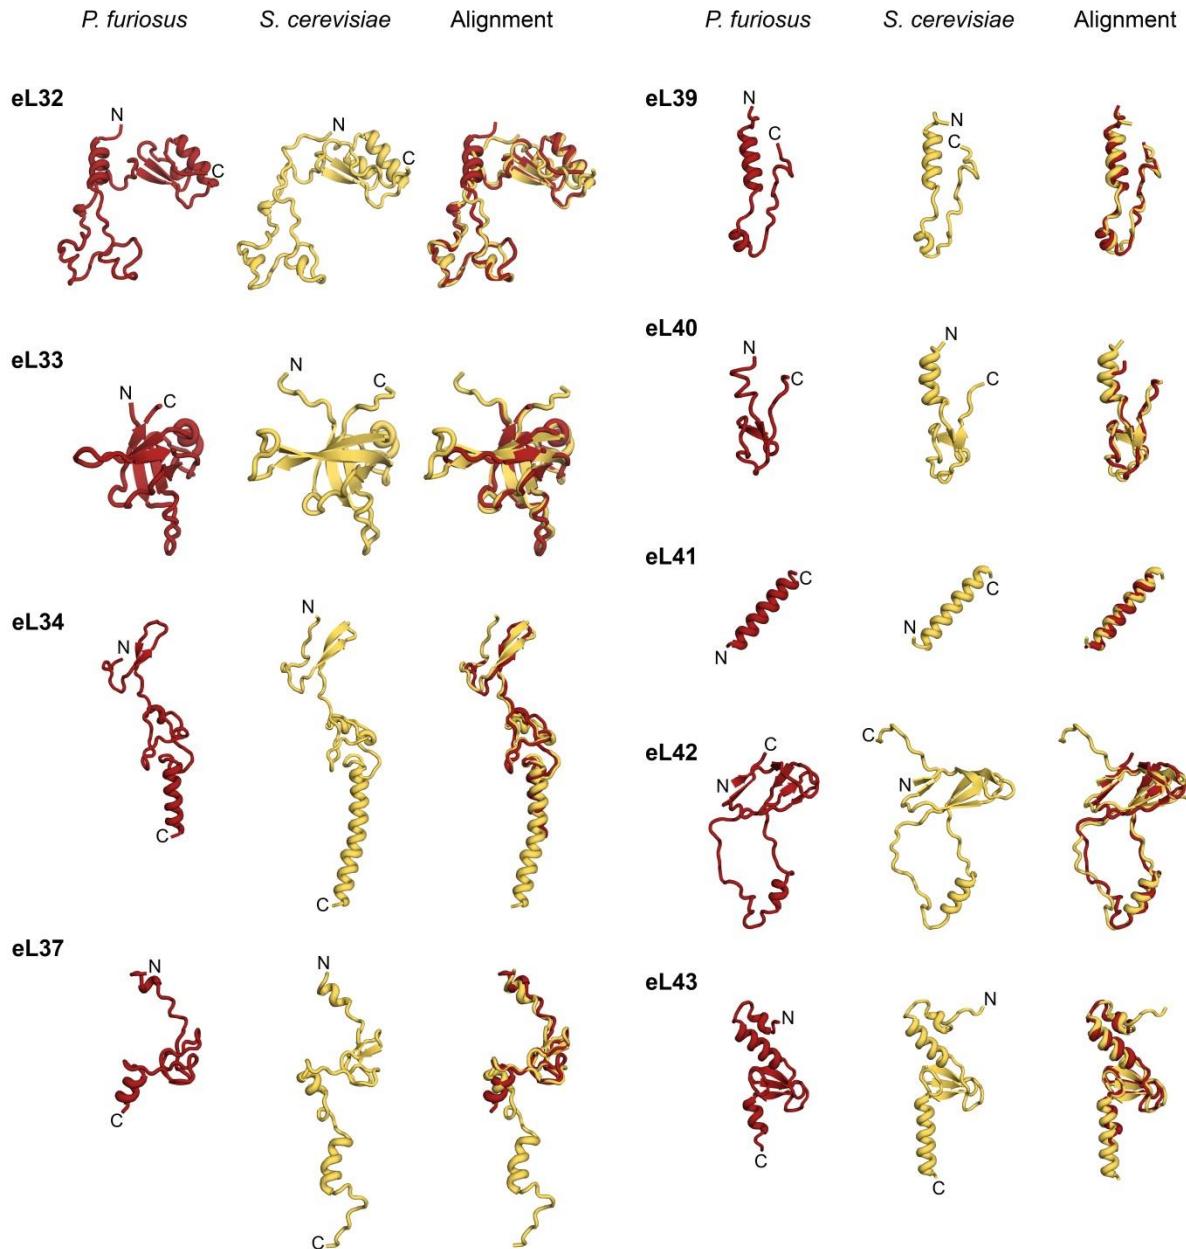

**Supplementary Figure S3. Comparison of the architecture of archaea/eukaryote-specific r-proteins of large ribosomal subunit.**

R-proteins from archaeal ribosome (*P. furiosus*) are colored red. R-proteins from eukaryotic ribosome (*S. cerevisiae*) are shown in yellow. The positions of the N and C termini are indicated. Structural alignments reveal the structurally conserved core and domain specific extensions.

PDB coordinates 4V6U for *P. furiosus* [5] and 4V88 for *S. cerevisiae* [6] were rendered in PyMol.

## Supplementary References

1. UniProt C. UniProt: the universal protein knowledgebase in 2021. *Nucleic acids research*. 2021;49(D1):D480-D9. doi: 10.1093/nar/gkaa1100.
2. Cherry JM, Hong EL, Amundsen C, Balakrishnan R, Binkley G, Chan ET, et al. *Saccharomyces Genome Database: the genomics resource of budding yeast*. *Nucleic acids research*. 2012;40:D700-5. doi: 10.1093/nar/gkr1029.
3. Ban N, Beckmann R, Cate JH, Dinman JD, Dragon F, Ellis SR, et al. A new system for naming ribosomal proteins. *Current opinion in structural biology*. 2014;24:165-9. doi: 10.1016/j.sbi.2014.01.002.
4. Loveland AB, Korostelev AA. Structural dynamics of protein S1 on the 70S ribosome visualized by ensemble cryo-EM. *Methods*. 2018;137:55-66. doi: 10.1016/j.ymeth.2017.12.004.
5. Armache JP, Anger AM, Marquez V, Franckenberg S, Frohlich T, Villa E, et al. Promiscuous behaviour of archaeal ribosomal proteins: implications for eukaryotic ribosome evolution. *Nucleic acids research*. 2013;41(2):1284-93. doi: 10.1093/nar/gks1259.
6. Ben-Shem A, Garreau de Loubresse N, Melnikov S, Jenner L, Yusupova G, Yusupov M. The structure of the eukaryotic ribosome at 3.0 Å resolution. *Science*. 2011;334(6062):1524-9. doi: 10.1126/science.
